# Supplementary material
Source: MDPI journal article supplement (https://www.mdpi.com/search?q=molbank-2021-M1271)
Supplement: s002 [file molbank-2021-M1271-s002-mod.mol]

Scheme 1.cdx
  corina  08132105143D 1   1.00000     0.00000 
CORINA 4.3.0 0026  30.10.2019
 38 41  0  0  0  0  0  0  0  0999 V2000
    4.2499    3.9838   -4.1152 C   0  0  0  0  0  0  0  0  0  0  0  0
    4.3113    3.6882   -2.7606 C   0  0  0  0  0  0  0  0  0  0  0  0
    4.2501    2.3503   -2.3532 C   0  0  0  0  0  0  0  0  0  0  0  0
    4.1346    1.3625   -3.3383 C   0  0  0  0  0  0  0  0  0  0  0  0
    4.0736    1.7438   -4.6714 C   0  0  0  0  0  0  0  0  0  0  0  0
    4.1347    3.0205   -5.0157 N   0  0  0  0  0  0  0  0  0  0  0  0
    4.3118    1.9900   -0.9215 C   0  0  0  0  0  0  0  0  0  0  0  0
    3.9523    0.7692   -5.6611 N   0  0  0  0  0  0  0  0  0  0  0  0
    4.3099    5.3127   -4.5329 N   0  0  0  0  0  0  0  0  0  0  0  0
    3.8350   -0.1614   -5.4136 H   0  0  0  0  0  0  0  0  0  0  0  0
    4.3173    6.0274   -3.8771 H   0  0  0  0  0  0  0  0  0  0  0  0
    4.3576    5.6042   -5.8479 C   0  0  0  0  0  0  0  0  0  0  0  0
    3.9981    1.1200   -6.9616 C   0  0  0  0  0  0  0  0  0  0  0  0
    4.3034    7.0396   -6.3039 C   0  0  0  0  0  0  0  0  0  0  0  0
    4.4441    4.7115   -6.6642 O   0  0  0  0  0  0  0  0  0  0  0  0
    3.7498    0.0866   -8.0300 C   0  0  0  0  0  0  0  0  0  0  0  0
    4.2392    2.2673   -7.2720 O   0  0  0  0  0  0  0  0  0  0  0  0
    5.4956    2.2600   -0.2112 C   0  0  0  0  0  0  0  0  0  0  0  0
    5.6094    1.9487    1.1112 N   0  0  0  0  0  0  0  0  0  0  0  0
    4.4299    1.3020    1.8099 B   0  5  0  0  0  0  0  0  0  0  0  0
    3.1848    1.0380    0.9866 N   0  3  0  0  0  0  0  0  0  0  0  0
    3.1844    1.3918   -0.3300 C   0  0  0  0  0  0  0  0  0  0  0  0
    6.7071    2.8396   -0.6122 C   0  0  0  0  0  0  0  0  0  0  0  0
    7.5265    2.8587    0.5037 C   0  0  0  0  0  0  0  0  0  0  0  0
    6.8140    2.3006    1.5473 C   0  0  0  0  0  0  0  0  0  0  0  0
    2.0108    0.5019    1.3019 C   0  0  0  0  0  0  0  0  0  0  0  0
    1.2069    0.4836    0.1786 C   0  0  0  0  0  0  0  0  0  0  0  0
    1.9330    1.0455   -0.8577 C   0  0  0  0  0  0  0  0  0  0  0  0
    4.8526    0.1050    2.3252 F   0  0  0  0  0  0  0  0  0  0  0  0
    4.0750    2.1037    2.8626 F   0  0  0  0  0  0  0  0  0  0  0  0
    7.0510    3.3440   -1.9900 C   0  0  0  0  0  0  0  0  0  0  0  0
    1.4683    1.2455   -2.2773 C   0  0  0  0  0  0  0  0  0  0  0  0
    1.6202   -0.0081    2.6651 C   0  0  0  0  0  0  0  0  0  0  0  0
    7.3216    2.1198    2.9547 C   0  0  0  0  0  0  0  0  0  0  0  0
   -0.2023   -0.0444    0.0977 C   0  0  0  0  0  0  0  0  0  0  0  0
   -0.1679   -1.5526   -0.1571 C   0  0  0  0  0  0  0  0  0  0  0  0
    8.9352    3.3901    0.5679 C   0  0  0  0  0  0  0  0  0  0  0  0
    8.9042    4.8737    0.9402 C   0  0  0  0  0  0  0  0  0  0  0  0
  1  2  2  0      
  2  3  1  0      
  3  4  2  0      
  4  5  1  0      
  5  6  2  0      
  6  1  1  0      
  3  7  1  0      
  5  8  1  0      
  1  9  1  0      
  8 10  1  0      
  9 11  1  0      
  9 12  1  0      
  8 13  1  0      
 12 14  1  0      
 12 15  2  0      
 13 16  1  0      
 13 17  2  0      
  7 18  1  0      
 18 19  1  0      
 19 20  1  0      
 20 21  1  0      
 21 22  1  0      
 22  7  2  0      
 18 23  2  0      
 23 24  1  0      
 24 25  2  0      
 25 19  1  0      
 21 26  2  0      
 26 27  1  0      
 27 28  2  0      
 28 22  1  0      
 20 29  1  0      
 20 30  1  0      
 23 31  1  0      
 28 32  1  0      
 26 33  1  0      
 25 34  1  0      
 27 35  1  0      
 35 36  1  0      
 24 37  1  0      
 37 38  1  0      
M  CHG  2  20  -1  21   1
M  END
$$$$
